# Supplementary material for: Bubble-PAPR: a phase 1 clinical evaluation of the comfort and perception of a prototype powered air-purifying respirator for use by healthcare workers in an acute hospital setting
Source: BMJ Open. 2023 May 8;13(5):e066524. doi: 10.1136/bmjopen-2022-066524 (PMC10174029; doi:10.1136/bmjopen-2022-066524)
Supplement: Supplementary data [file bmjopen-2022-066524supp003.pdf]

Table S5. Rating scales, summary results and comparisons across all of the questionnaire domains.

|              | PPE             | Q1 Confidence in donning | Q2 Confidence in donning without dislodging other PPE | Q3 Wear with glasses/goggles | Q4 Protect yourself from respiratory infection | Q5 Protect patient from infection from you | Q6 Safely care for your patient | Q7 Safely roll patient | Q8 Speak to staff    | Q9 Be heard by staff | Q10 Speak to patient | Q11 Be heard by patient | Q12 Doff safely      | Q13 Doff without dislodging glasses |
|--------------|-----------------|--------------------------|-------------------------------------------------------|------------------------------|------------------------------------------------|--------------------------------------------|---------------------------------|------------------------|----------------------|----------------------|----------------------|-------------------------|----------------------|-------------------------------------|
| Rating scale | From:           | 0 - no confidence        | 0 - no confidence                                     | 0 - no confidence            | 0 - no confidence                              | 0 - no confidence                          | 0 - no confidence               | 0 - no confidence      | 0 - no confidence    | 0 - no confidence    | 0 - no confidence    | 0 - no confidence       | 0 - no confidence    | 0 - no confidence                   |
|              | To:             | 10 - fully confident     | 10 - fully confident                                  | 10 - fully confident         | 10 - fully confident                           | 10 - fully confident                       | 10 - fully confident            | 10 - fully confident   | 10 - fully confident | 10 - fully confident | 10 - fully confident | 10 - fully confident    | 10 - fully confident | 10 - fully confident                |
|              |                 |                          |                                                       |                              |                                                |                                            |                                 |                        |                      |                      |                      |                         |                      |                                     |
| RPE type     | FFP3            | 8.9 (1.4) [3 - 10]       | 8.3 (2) [2 - 10]                                      | 6.9 (2.6) [2 - 10]           | 8.2 (1.6) [4 - 10]                             | 8.2 (1.7) [2 - 10]                         | 8.4 (1.4) [5 - 10]              | 8.2 (1.8) [2 - 10]     | 5.1 (2.4) [1 - 10]   | 4.9 (2.3) [1 - 10]   | 4.8 (2.4) [1 - 10]   | 4.7 (2.5) [1 - 10]      | 8.1 (1.9) [2 - 10]   | 6.2 (2.5) [1 - 10]                  |
|              | Bubble          | 7.4 (1.8) [3 - 10]       | 7.7 (1.8) [2 - 10]                                    | 7.6 (1.9) [3 - 10]           | 8.6 (1.6) [3 - 10]                             | 8.5 (1.8) [2 - 10]                         | 8.0 (2) [2 - 10]                | 7.8 (2.2) [2 - 10]     | 7.5 (2.4) [1 - 10]   | 7.1 (2.3) [1 - 10]   | 7.8 (2.1) [2 - 10]   | 7.4 (2.4) [1 - 10]      | 8.0 (1.8) [2 - 10]   | 7.8 (1.9) [2 - 10]                  |
| Comparison   | Mean difference | -1.48                    | -0.55                                                 | 0.7                          | 0.43                                           | 0.3                                        | -0.42                           | -0.42                  | 2.38                 | 2.16                 | 2.99                 | 2.7                     | -0.1                 | 1.66                                |
|              | 95% CI          | -1.9 to -0.99            | -1.12 to 0.02                                         | -0.00 to 1.40                | -0.04 to 0.89                                  | -0.18 to 0.78                              | -0.91 to 0.07                   | -0.98 to 0.15          | 1.66 to 3.11         | 1.45 to 2.88         | 2.36 to 3.62         | 1.97 to 3.43            | -0.63 to 0.43        | 0.98 to 2.34                        |
|              |                 | Favours FFP3             | No difference                                         | Favours Bubble               | No difference                                  | No difference                              | No difference                   | No difference          | Favours Bubble       | Favours Bubble       | Favours Bubble       | Favours Bubble          | No difference        | Favours Bubble                      |
|              | Adjusted p      | <0.001                   | 0.058                                                 | 0.049                        | 0.070                                          | 0.217                                      | 0.092                           | 0.144                  | <0.001               | <0.001               | <0.001               | <0.001                  | 0.711                | <0.001                              |

|              | PPE             | Q14 How safe does it feel | Q15 Worried about own health | Q16 Worried others health | Q17 Comfortable        | Q18 Don ease        | Q19 Doff ease       | Q20a Restricted communication | Q20b Vision distorted with Bubble | Q20c Read monitors, computers, and notes with Bubble | Q21 Pressure marks on head/face | Q22 Pain on head/face | Q23 Leave clinical area early due to RPE |
|--------------|-----------------|---------------------------|------------------------------|---------------------------|------------------------|---------------------|---------------------|-------------------------------|-----------------------------------|------------------------------------------------------|---------------------------------|-----------------------|------------------------------------------|
| Rating scale | From:           | 1 - very unsafe           | 1 - not worried at all       | 1 - not worried at all    | 1 - very uncomfortable | 1 - not at all easy | 1 - not at all easy | 1 - not at all restricted     | 1 - not at all affected           | 1 - clear at all times                               | 1 - never                       | 1 - never             | 1 - never                                |
|              | To:             | 7 very safe               | 7 - very worried             | 7 - very worried          | 7 - very comfortable   | 7 - very easy       | 7 - very easy       | 7 - very restricted           | 7 - very affected                 | 7 - not clear at all                                 | 7 - always                      | 7 - always            | 7 - always                               |
|              |                 |                           |                              |                           |                        |                     |                     |                               |                                   |                                                      |                                 |                       |                                          |
| RPE type     | FFP3            | 5.4 (1.0) [3 - 7]         | 3.2 (1.5) [1 - 7]            | 3.2 (1.5) [1 - 7]         | 3 (1.4) [1 - 6]        | 4.9 (1.3) [2 - 7]   | 5.1 (1.3) [2 - 7]   | 5.4 (1.4) [1 - 7]             | -                                 | -                                                    | 5.8 (1.4) [1 - 7]               | 5.3 (1.4) [1 - 7]     | 3.6 (1.6) [1 - 7]                        |
|              | Bubble          | 6.2 (0.9) [3 - 7]         | 2.3 (1.6) [1 - 7]            | 2.3 (1.7) [1 - 7]         | 5.6 (1.6) [1 - 7]      | 5.5 (1.4) [2 - 7]   | 5.7 (1.2) [2 - 7]   | 3.9 (1.7) [1 - 7]             | 3.2 (1.9) [1 - 7]                 | 5.6 (1.5) [2 - 7]                                    | 1.3 (0.8) [1 - 6]               | 1.4 (0.9) [1 - 6]     | 1.5 (1) [1 - 6]                          |
| Comparison   | Mean difference | 0.73                      | -0.92                        | -0.93                     | 2.68                   | 0.62                | 0.63                | -1.49                         | -                                 | -                                                    | -4.54                           | -3.99                 | -2.13                                    |
|              | 95% CI          | 0.45 to 0.99              | -1.36 to -0.49               | -1.36 to -0.48            | 2.23 to 3.14           | 0.21 to 1.02        | 0.26 to 0.99        | -1.95 to -1.04                | -                                 | -                                                    | -4.90 to -4.17                  | -4.35 to -3.63        | -2.51 to -1.75                           |
|              |                 | Favours Bubble            | Favours Bubble               | Favours Bubble            | Favours Bubble         | Favours Bubble      | Favours Bubble      | Favours Bubble                | No comparator                     | No comparator                                        | Favours Bubble                  | Favours Bubble        | Favours Bubble                           |
|              | Adjusted p      | <0.001                    | <0.001                       | <0.001                    | <0.001                 | 0.003               | 0.002               | <0.001                        | -                                 | -                                                    | <0.001                          | <0.001                | <0.001                                   |
